# Supplementary material
Source: publisher site journal article supplement (http://www.dovepress.com/get_supplementary_file.php?f=217474.docx)
Supplement: Supplementary file 1 [file get_supplementary_file.php]

**Smokers with COPD Show a Shift in Energy and Nitrogen Metabolism at Rest and During Exercise**

Holz Olaf, DeLuca David S., Röpcke Stefan, Illig Thomas, Weinberger M. Klaus, Schudt Christian, Hohlfeld Jens M.

Online Data Supplement

Figure E1: Correlation between acylcarnitine C2 and total acylcarnitines separately for smokers with and without COPD and the 4 time points (1: before, 2: after 5 min, 3: at the end of exercise, 4: after 20 min rest). Data of the first exercise challenge.


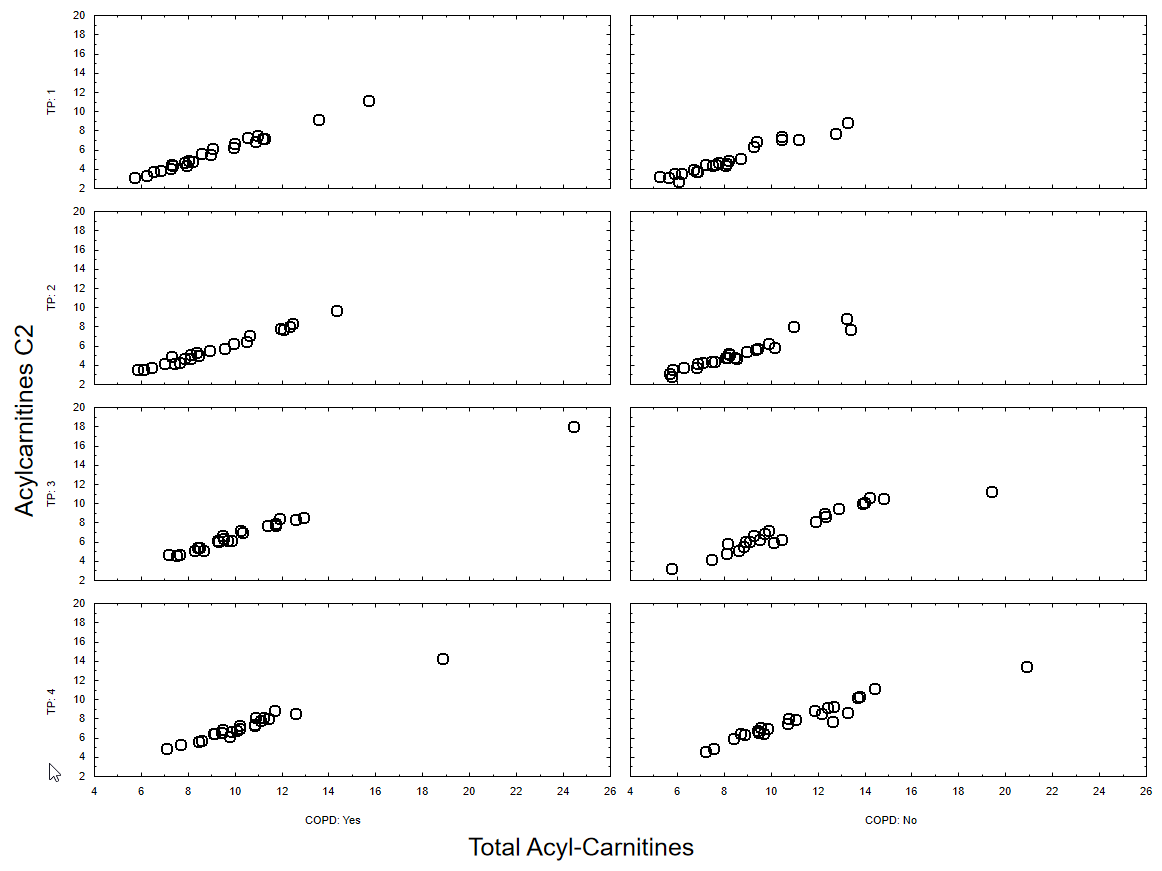


Figure E2: Correlation between lactate and pyruvate separately for smokers with and without COPD and the 4 time points (1: before, 2: after 5 min, 3: at the end of exercise, 4: after 20 min rest). Data of the first exercise challenge.


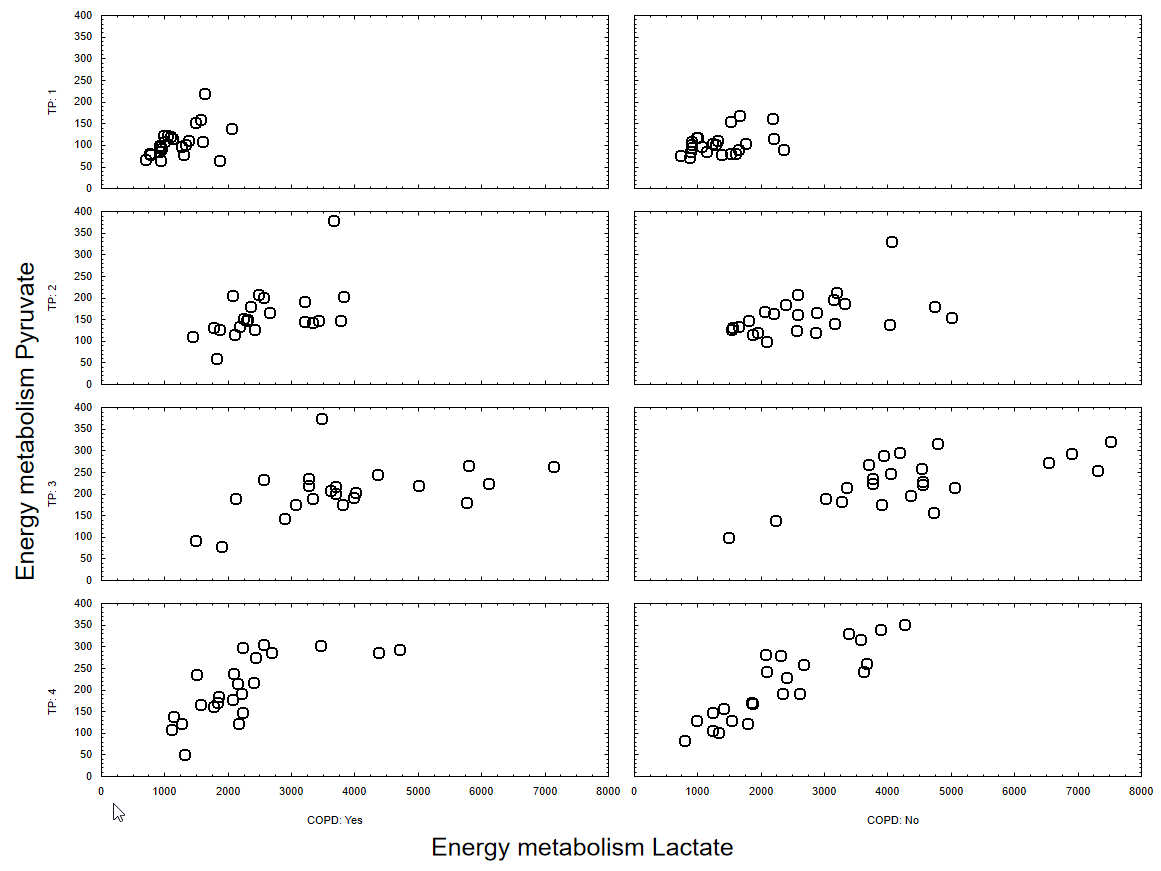


Figure E3: Correlation between GLN and ALA separately for smokers with and without COPD and the 4 time points (1: before, 2: after 5 min, 3: at the end of exercise, 4: after 20 min rest). Data of the first exercise challenge.


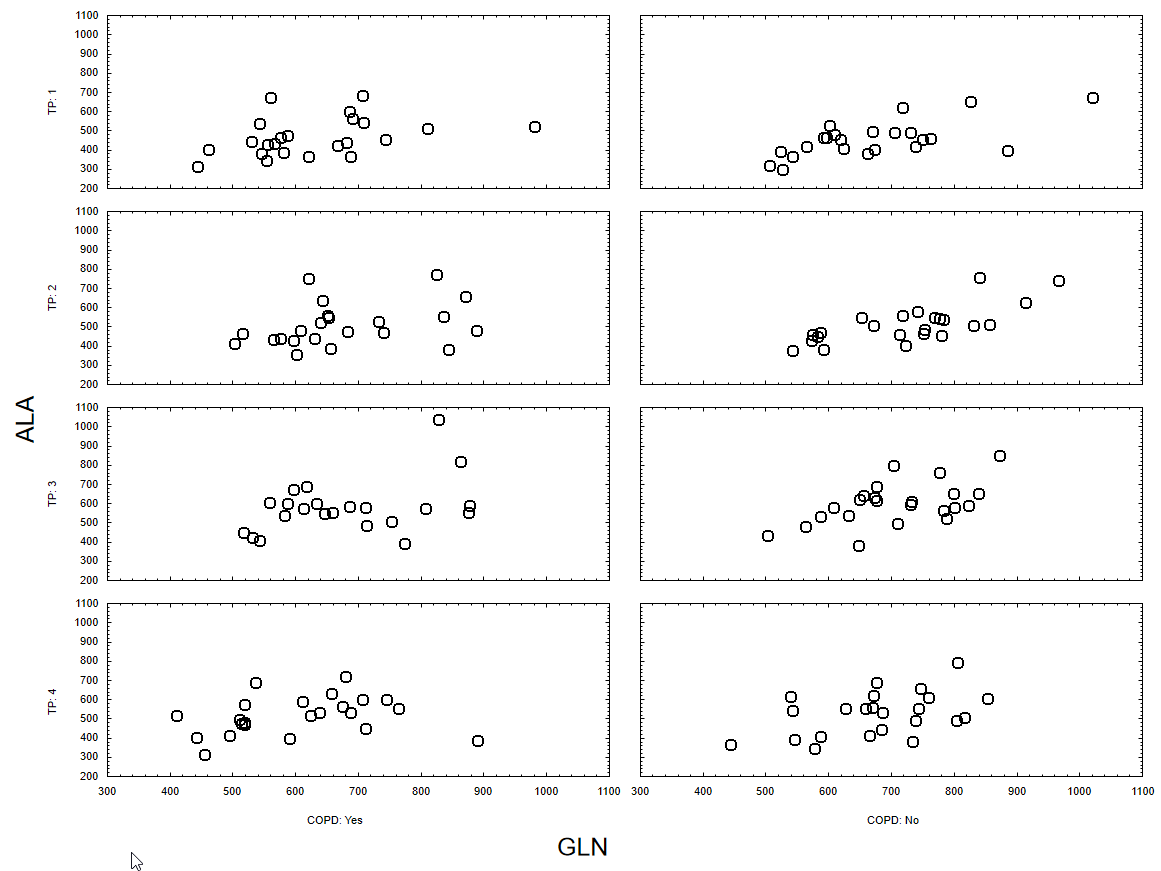


Figure E4: Correlation between GLN and BCAA separately for smokers with and without COPD and the 4 time points (1: before, 2: after 5 min, 3: at the end of exercise, 4: after 20 min rest). Data of the first exercise challenge.


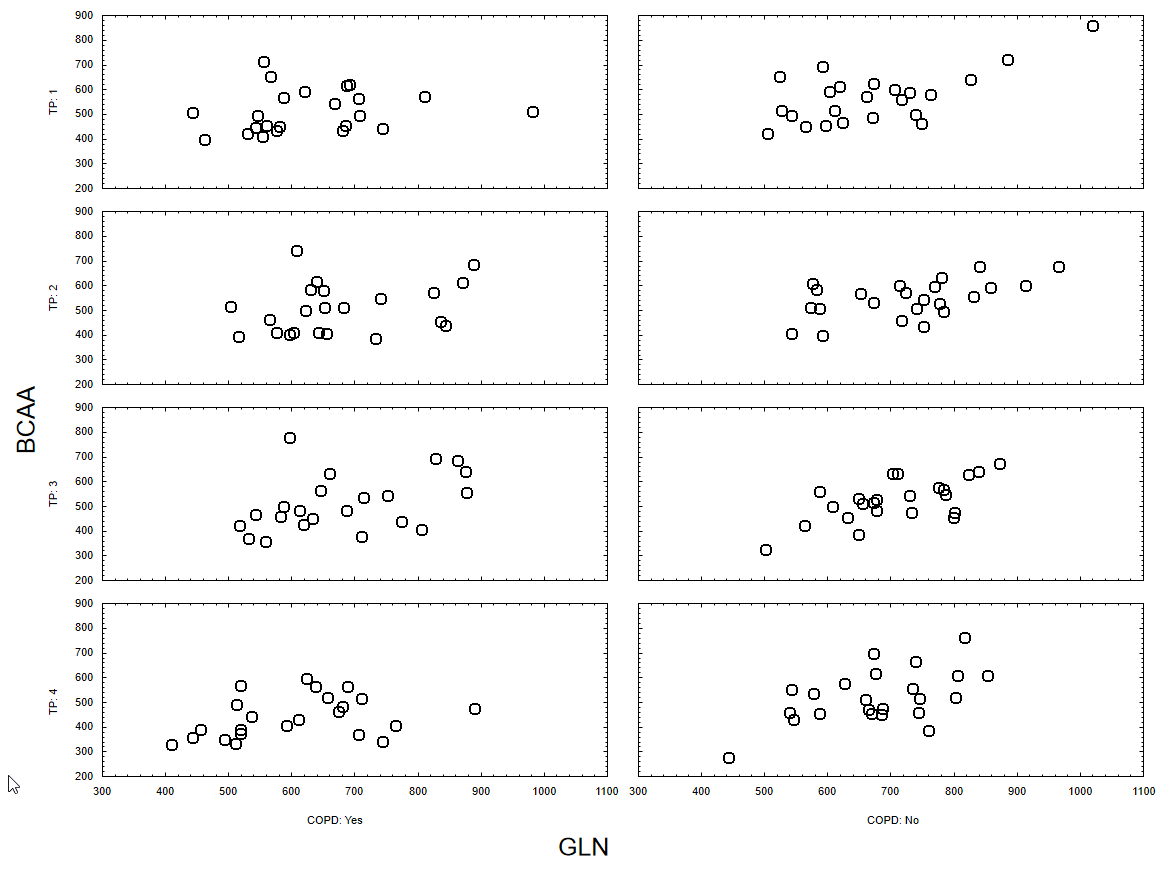


Figure E5: Correlation between GLN and ASP separately for smokers with and without COPD and the 4 time points (1: before, 2: after 5 min, 3: at the end of exercise, 4: after 20 min rest). Data of the first exercise challenge.


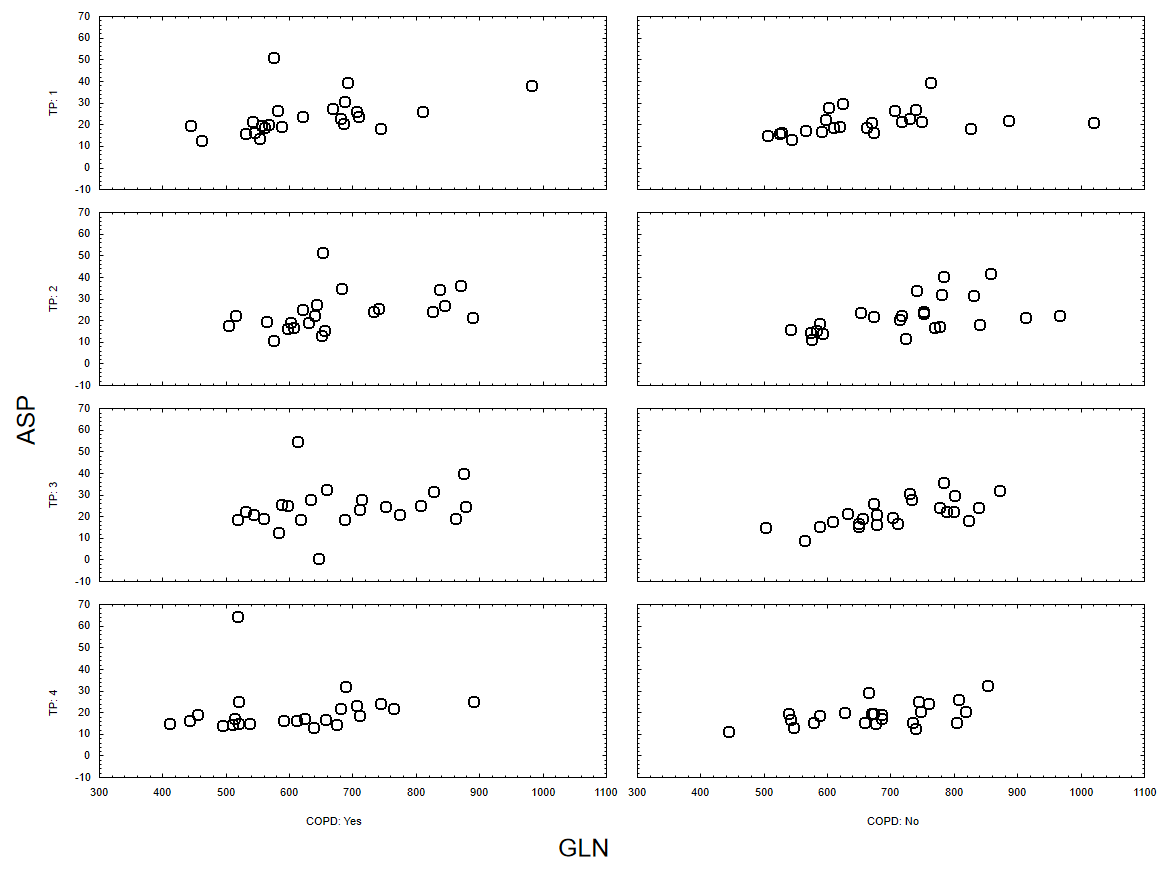


Figure E6: Correlation between duration of exercise (min) and the levels of a-KG and succinate (µM)


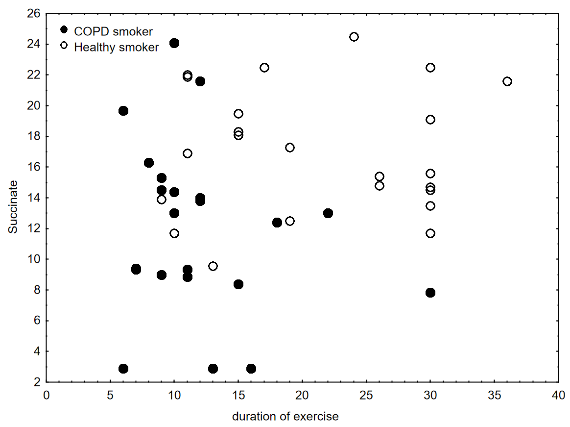

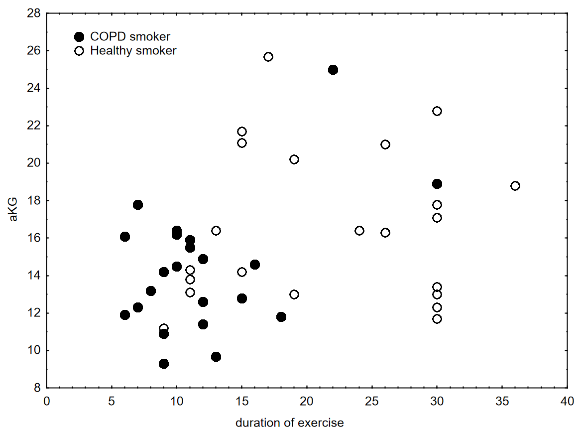


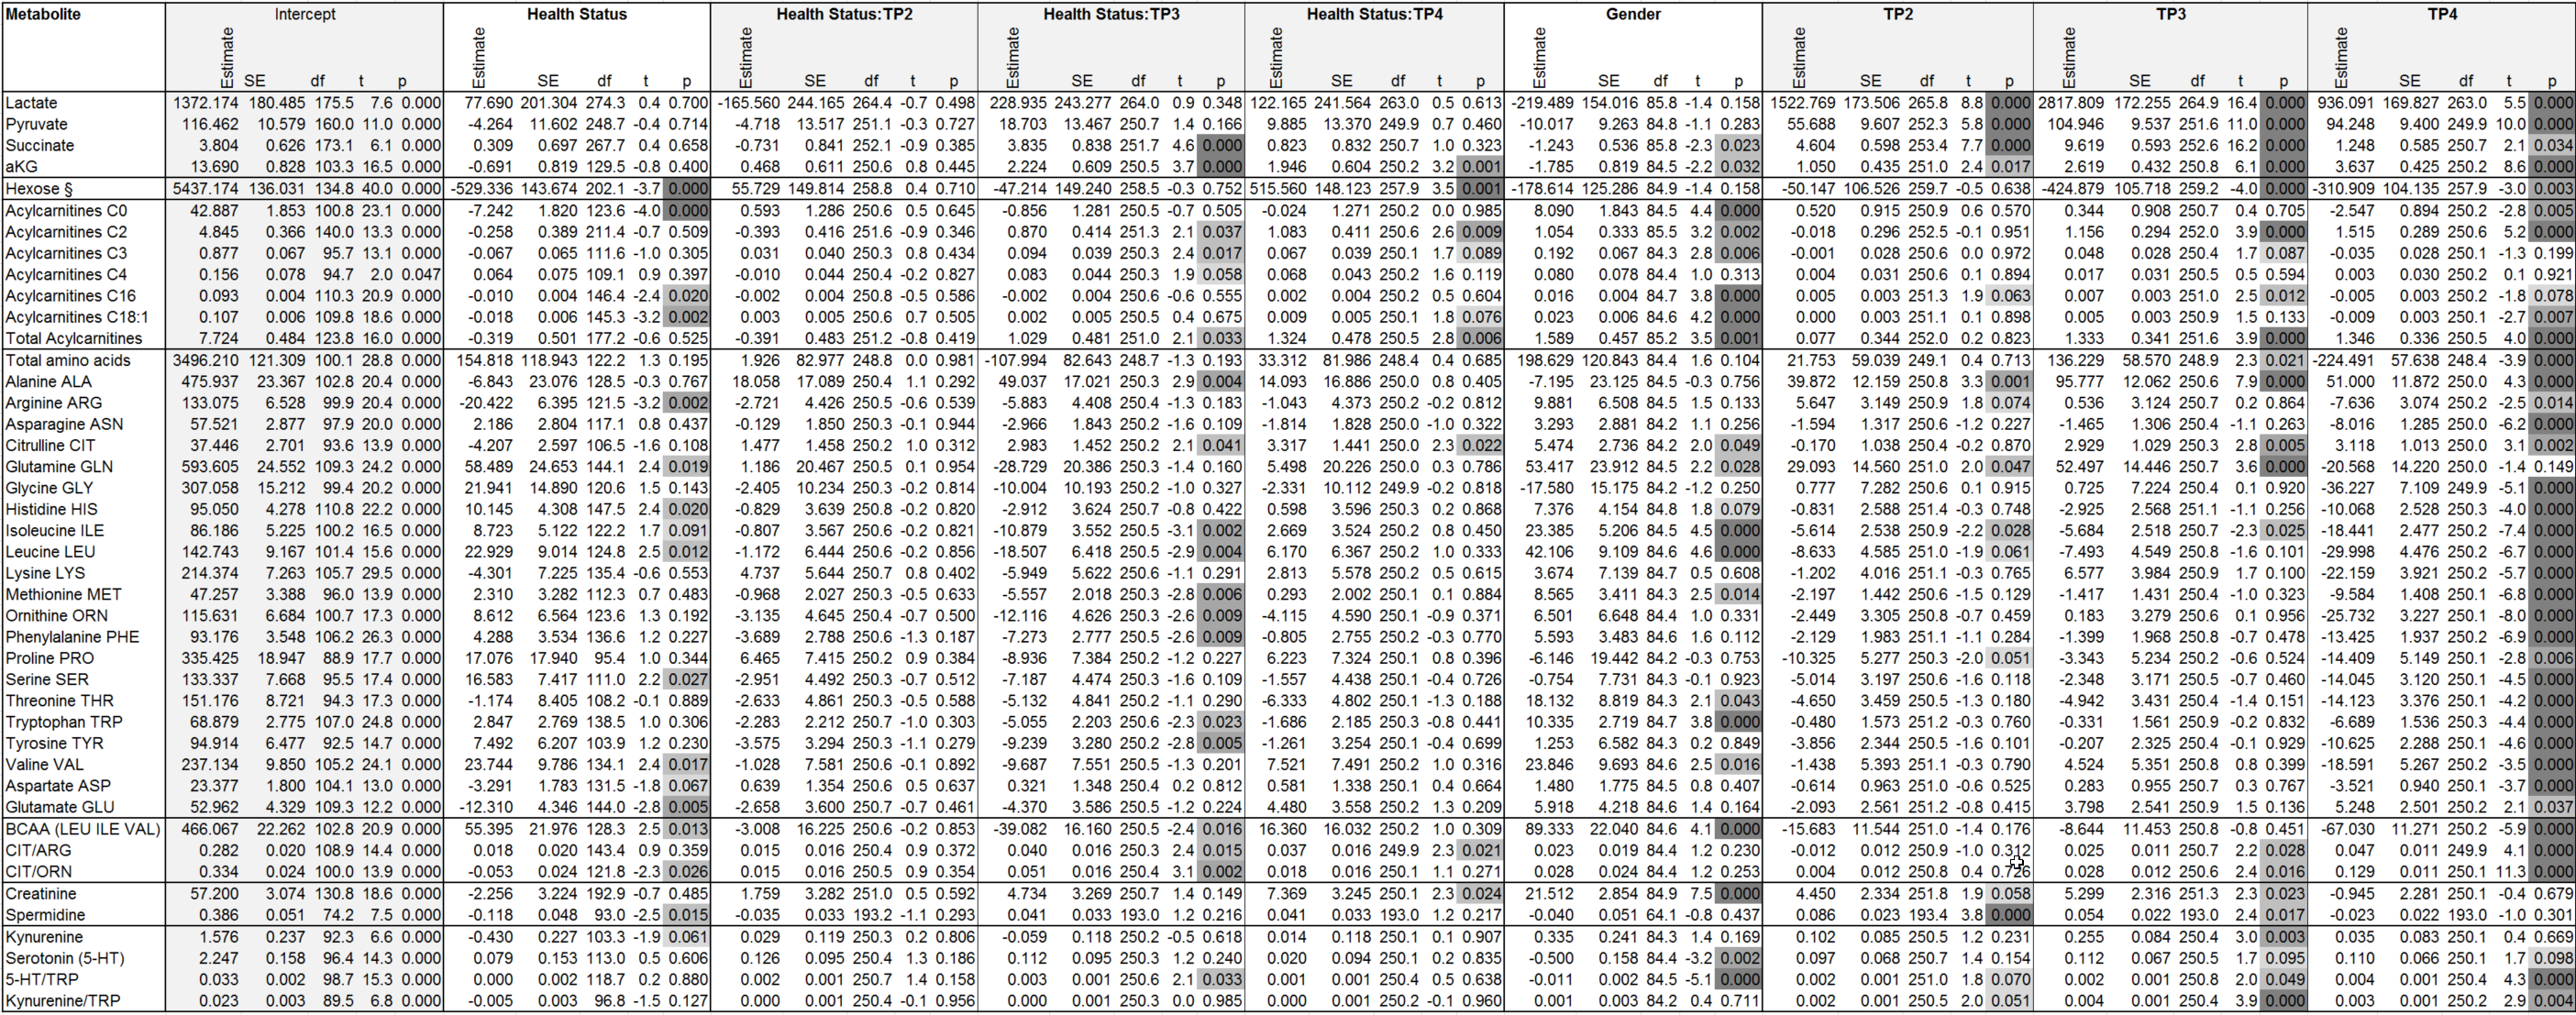
Table E1: List of parameter estimates and statistics from the mixed model analysis.

Health status is in reference to healthy smokers as baseline, and TP2,3,4 are in reference to TP1 as baseline.
